# Supplementary material for: DNA–Methylome Analysis of Mouse Intestinal Adenoma Identifies a Tumour-Specific Signature That Is Partly Conserved in Human Colon Cancer
Source: PLoS Genet. 2013 Feb 7;9(2):e1003250. doi: 10.1371/journal.pgen.1003250 (PMC3567140; doi:10.1371/journal.pgen.1003250)
Supplement: Table S1 — Sequencing statistics. The number of generated lanes, aligned single 36mer reads, uniquely aligned reads and the CpG enrichment frequency is given. The relative frequency of CpG enrichment was calculated using the MeDIPS package (Chavez et al., 2010, Genome Res. 20(10):1441–50). The CpG enrichment evaluates the frequency of CpGs within the total number of sequenced nucleotides with respect to the frequency of CpGs within the mm9 reference genome. The column qPCR shows the fold enrichment of a normally methylated region (Xist) over an unmethylated region (Csa) [6]. The sample names are as given in Figure 1a. The numbers indicate the animals, i.e. N4, Ad4 and Ad4-1 are samples derived from the same animal. Ad4 and Ad4-1 are different adenomas isolated from the same animal. MeDIP-seq and RNA-seq were generated from material obtained from the same tissue sample (i.e. MeDIP_N4 and RNA_N4). (XLS) [file pgen.1003250.s009.xls]

## Sheet: Sheet1
Supplementary Table S1: Sequencing statistics. The number of generated lanes, aligned single 36mer reads, uniquely aligned reads and the CpG enrichment frequency is given. The relative frequency of CpG enrichment was calculated using the MeDIPS package (Chavez et al., 2010, Genome Res. 20(10):1441-50). The CpG enrichment evaluates the frequency of CpGs within the total number of sequenced nucleot…
a) MeDIP-seq
sample name_new	Genotype	Ileum tissue	Number of lanes	Total number of reads	Uniquely aligned reads (duplicates removed)	% Uniquely aligned reads of total reads	CpG enrichment (relative frequency)	qPCR Xist vs Csa (2-delta Ct)
MeDIP_B1	B6-Apc(+/+)	normal mucosa	4	51036009	18687303	0.366159	2.48	83
MeDIP_B2	B6-Apc(+/+)	normal mucosa	5	53980641	21387735	0.396211	2.67	53
MeDIP_B3	B6-Apc(+/+)	normal mucosa	3	45673959	20080749	0.439654	2.4	107
MeDIP_N4	B6-Apc(Min/+)	normal mucosa	7	54509092	18065841	0.331428	2.55	34
MeDIP_N5	B6-Apc(Min/+)	normal mucosa	5	74702628	26297510	0.352029	2.45	81
MeDIP_N6	B6-Apc(Min/+)	normal mucosa	3	50482214	22225657	0.440267	2.58	78
MeDIP_Ad4	B6-Apc(Min/+)	adenoma	8	59068887	20739752	0.351111	2.59	65
MeDIP_Ad4-1	B6-Apc(Min/+)	adenoma	5	45375262	17315974	0.381617	2.61	37
MeDIP_Ad5	B6-Apc(Min/+)	adenoma	5	44734362	18416709	0.41169	2.57	81
MeDIP_Ad6	B6-Apc(Min/+)	adenoma	4	50412033	21175049	0.42004	2.37	43
MeDIP_Ad7	B6-Apc(Min/+)	adenoma	4	35000228	13878615	0.396529	2.67	72
sum		11 samples	53	564975315	218270894	NA	NA	NA
average per sample			4.81818	5.13614e+07	1.98428e+07	0.389703	2.54	66.7273
median per sample			5	50482214	20080749	0.396211	2.57	72
sample_name_new	Genotype	Ileum tissue	Number of lanes	Total number of reads	Uniquely aligned reads (duplicates removed)	% Uniquely aligned reads of total reads	CpG enrichment (relative frequency)
Input_B3	B6-Apc(+/+)	normal	1	4640848	3228908	0.695758	1.23
Input_N4	B6-Apc(Min/+)	normal	1	7819526	5165769	0.660624	1.01
Input_Ad7	B6-Apc(Min/+)	adenoma	1	8900651	5931425	0.666404	0.99
sum		3 samples	3	21361025	14326102	NA	NA
average per sample			1	7.12034e+06	4.77537e+06	0.666404	1.07667
median per sample			1	7819526	5165769	0.666404	1.01
Number of C, G and CpG in the mm9 genome
Number of bases mm9	Number of C	Number of G	Number of CpG	Relative frequency of CpGs in the genome	Number of CpG islands*	Number of CpG islands (UCSC)
2.55853e+09	534146040	534300392	21342779	0.834183	46823	16026
*calculated using the criteria described in the material and methods section and the CpG island searcher (Takai D, Jones PA. 2003. In Silico Biol.3(3):235-40.)
b) RNA-seq
sample_name_new	Genotype	Ileum tissue	Number of lanes	Total number of reads	Total number of aligned reads	Uniquely aligned reads	Uniquely aligned to exon or exon junction (Ensembl58)
RNA_B1	B6-Apc(+/+)	normal mucosa	1	17132023	14146358	7900155	4630588
RNA_B2	B6-Apc(+/+)	normal mucosa	1	17391145	13875400	8032083	5301476
RNA_N4	B6-Apc(Min/+)	normal mucosa	2	24919158	20202924	10945045	6460878
RNA_N5	B6-Apc(Min/+)	normal mucosa	2	25091077	19489191	10236296	5499824
RNA_Ad4	B6-Apc(Min/+)	adenoma	2	28210884	21844559	11698136	5698311
RNA_Ad4-1	B6-Apc(Min/+)	adenoma	2	24185260	18931946	9907407	4475183
RNA_Ad5	B6-Apc(Min/+)	adenoma	1	16789303	13199054	7004152	3844021
sum		7 samples	11	153718850	121689432	NA	NA
average per sample			1.57143	2.30618e+07	1.73842e+07	9.38904e+06	5.13004e+06
median per sample			2	24185260	18931946	9907407	5301476
